# Supplementary material
Source: Elsevier journal article supplement (https://www.sciencedirect.com/science/article/pii/S1888400818300047)
Supplement: mmc1 [file S1888400818300047:mmc1.pdf]

## Anexo. Ejemplo

Paciente sometido a una cirugía bariátrica con sospecha de déficit de vitaminas liposolubles y al que se le solicita la medición de la concentración de masa de retinol y  $\alpha$ -tocoferol en el suero, obteniéndose los siguientes valores medidos:

Srm—Retinol; c.masa = 0,25 mg/L Intervalo de referencia (0,30-1,00) mg/L

Srm— $\alpha$ -Tocoferol; c.masa = 6,0 mg/L Intervalo de referencia (5,0-20) mg/L

Posteriormente, se somete al paciente a una dieta con un aporte vitamínico y, dos meses después, se repite el examen de laboratorio obteniéndose los siguientes valores:

Srm—Retinol; c.masa = 0,33 mg/L

Srm— $\alpha$ -Tocoferol; c.masa = 10,5 mg/L

Para cada magnitud, ¿son los cambios observados en los valores medidos clínicamente significativos? ¿Ha resultado ser efectivo el tratamiento?

Procedimiento de medida: Equipo de reactivos *ClinRep® HPLC Complete kit for vitamin A and E in plasma/serum* (Ref: 22000 de Recipe) empleado en el sistema Acquity® UPLC®-UV® de Waters Cromatografía.

Estudio de la interpretación de un cambio para Srm—Retinol; c.masa:

– Datos relacionados con el material de calibración:

- Material de calibración: *ClinCal® Serum Calibrator lyophilised for Vitamin A and E* (Ref: 22013 de Recipe).

- 22 • Valor asignado al material de calibración = 1,62 mg/L.
- 23 • Incertidumbre expandida asociada al valor del material de calibración
- 24 facilitada por el fabricante = 1,2 % ( $k = 2$ ).
- 25 • Trazabilidad: Valor trazable al material de referencia certificado del NIST
- 26 *SRM968e*.
- 27 – Datos de imprecisión interdiaria:
  - 28 •  $CV_{id0} = 12,7 \%$  a un valor medio de 0,20 mg/L
  - 29 •  $CV_{id1} = 7,0 \%$  a un valor medio de 0,40 mg/L
- 30 – Datos relacionados con el sesgo relativo:
  - 31 • En la validación del procedimiento de medida se obtuvo un sesgo relativo
  - 32 significativo del -10,3 % que fue corregido mediante la utilización de un factor
  - 33 de corrección. La incertidumbre estándar relativa del factor empleado para
  - 34 corregir el sesgo de medida ( $u_{fc}$ ) = 2,6 %.
- 35 – Dato del coeficiente de variación biológico intraindividual ( $CV_I$ ) (16):
- 36  $CV_I = 6,2 \%$
- 37 1) Se calcula la diferencia relativa (en valor absoluto) entre los dos valores
- 38 medidos obtenidos:
 
$$d_r = \left| \left( \frac{0,33 - 0,25}{0,25} \right) \cdot 100 \right| = 32 \%$$
- 39
- 40 2) Como  $d_r \neq 0$ , debe calcularse la  $U_d$ :
  - 41 • La  $U_d$  se calcula a partir de los valores del  $CV_{id}$ , la  $u_{cal}$ , la  $u_{fc}$  y el  $CV_I$ .
  - 42 • Al depender el  $CV_{id}$  del valor del mensurando, la  $U_d$  se calcula como:

$$U_d = 2 \cdot \left( CV_{id_1}^2 + CV_{id_0}^2 + 2 \cdot u_{cal}^2 + 2 \cdot u_{fc}^2 + 2 \cdot CV_I^2 \right)^{1/2}$$

$$U_d = 2 \cdot \left( 7,0^2 + 12,7^2 + 2 \cdot 0,6^2 + 2 \cdot 2,6^2 + 2 \cdot 6,2^2 \right)^{1/2}$$

$$U_d = 34,7 \%$$

3) Como  $d_r < U_d$  ( $32,0 < 34,7$ ), el cambio **NO** es significativo, es decir, que el tratamiento realizado (administración vitamínica) **NO** ha resultado ser efectivo.

#### Estudio de la interpretación de un cambio para Srm— $\alpha$ -Tocoferol; c.masa:

– Datos relacionados con el material de calibración:

- Material de calibración: *ClinCal® Serum Calibrator lyophilised for Vitamin A and E* (Ref: 22013 de Recipe).

- Valor asignado al material de calibración = 22,9 mg/L.

- Incertidumbre expandida asociada al valor del material de calibración facilitada por el fabricante = 0,4 % ( $k = 2$ ).

- Trazabilidad: Valor trazable al material de referencia certificado del NIST *SRM968e*.

– Datos de imprecisión en el laboratorio:

- $CV_{id} = 7,5 \%$  a un valor medio de 8,00 mg/L.

- $CV_{id} = 5,0 \%$  a un valor medio de 14,0 mg/L.

– Datos del sesgo relativo:

- No existe un sesgo significativo, por lo que no es necesario aplicar un factor de corrección y, por consiguiente, su  $u_{fc} = 0 \%$ .

– Dato del coeficiente de variación biológico intraindividual ( $CV_I$ ) (16).

64  $CV_I = 7,6 \%$

65 1) Se calcula la diferencia relativa (en valor absoluto) entre los dos valores  
66 medidos obtenidos:

$$67 \quad d_r = \left| \left( \frac{10,5 - 6,00}{6,00} \right) \cdot 100 \right| = 75 \%$$

68 2) Como  $d_r \neq 0$ , debe calcularse la  $U_d$ :

- 69
- La  $U_d$  se calcula a partir de los valores del  $CV_{id}$ , la  $u_{cal}$  y el  $CV_I$ .
- 70
- Al NO depender el  $CV_{id}$  del valor del mensurando, la  $U_d$  se calcularía
- 71 como:

$$72 \quad U_d = 2,83 \cdot \left( CV_{id}^2 + u_{cal}^2 + u_{fc}^2 + CV_I^2 \right)^{1/2}$$

$$73 \quad U_d = 2,83 \cdot (7,5^2 + 0,20^2 + 0^2 + 7,6^2)^{1/2}$$

$$74 \quad U_d = 30,2 \%$$

75 3) Como  $d_r > U_d$  (**75,0 > 30,2**), el cambio **SI** es significativo, es decir, que el  
76 tratamiento realizado (administración vitamínica) ha resultado ser efectivo.

77

78
